# Supplementary material for: A mitochondria-oriented fluorescent probe for ultrafast and ratiometric detection of HSO3− based on naphthalimide–hemicyanine
Source: Royal Society of Chemistry journal article supplement (doi:10.1039/c9nj01467e), 2019-01-01

## Supporting Information

Ronghua Shen, Ying Qian\*

School of Chemistry and Chemical Engineering, Southeast University, Nanjing 211189, China.

\*Correspondence should be addressed to Ying Qian ([yingqian@seu.edu.cn](mailto:yingqian@seu.edu.cn)).

**Fig S1.** The fluorescent spectra of Np and Cy.

**Fig S2.** Cytotoxicity assays of probe Np-Cy at different concentrations for MCF-7 cells.

**Fig S3.**  $^1\text{H-NMR}$  spectrum of Np-Cy.

**Fig S4.**  $^{13}\text{C-NMR}$  spectrum of Np-Cy.

**Fig S5.** MS spectrum of Np-Cy.

**Fig S1. The fluorescent spectra of Np and Cy.**

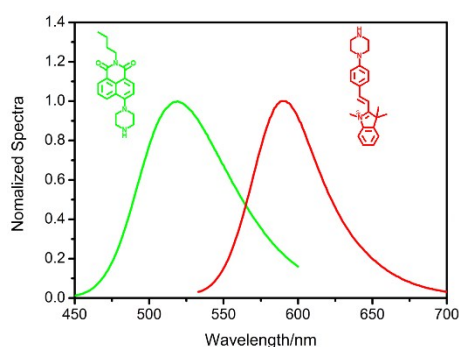

**Fig S1.** The fluorescent spectra of Np (10  $\mu\text{M}$ ) and Cy (10  $\mu\text{M}$ ) in pH 7.4 PBS (containing 40% DMF as a co-solvent).

**Fig S2.** Cytotoxicity assays of probe Np-Cy at different concentrations for MCF-7 cells.

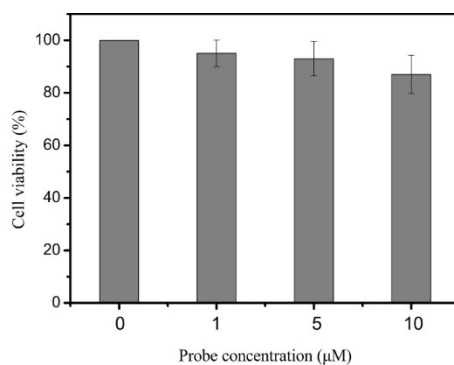

**Fig S2.** Cytotoxicity assays of probe Np-Cy at different concentrations for MCF-7 cells

**Fig S3.** <sup>1</sup>H-NMR spectrum of Np-Cy.

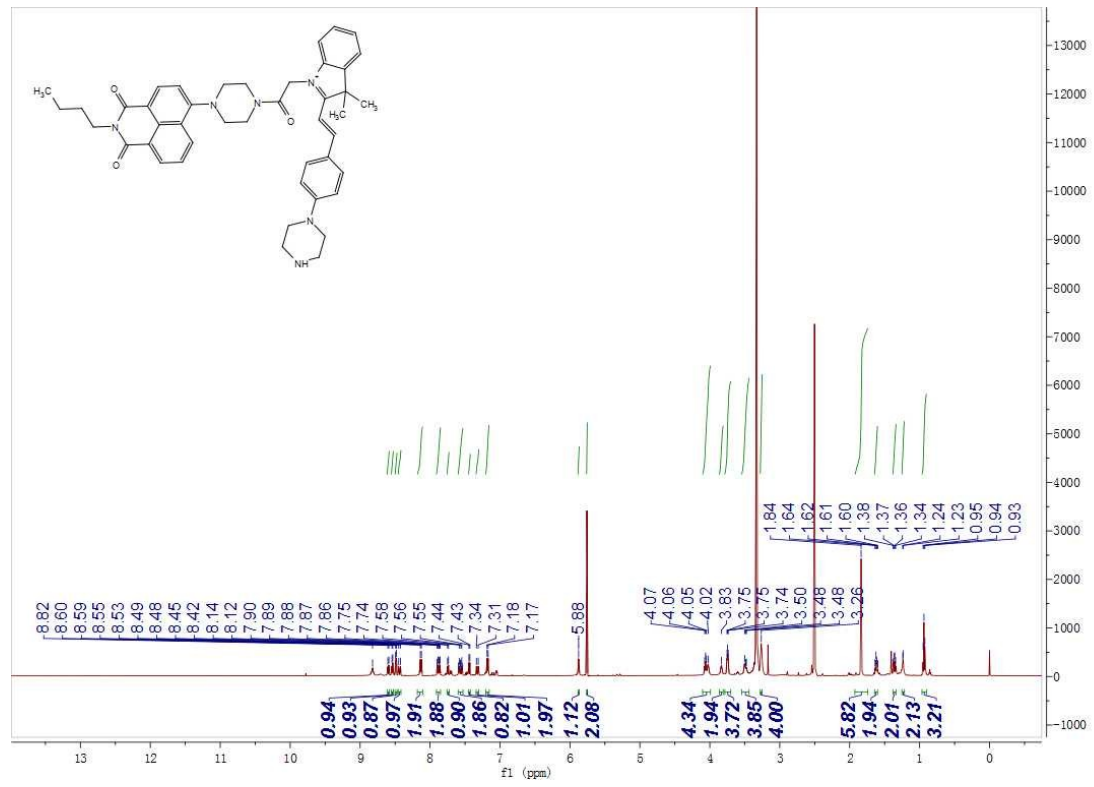

**Fig S4.** <sup>13</sup>C-NMR spectrum of Np-Cy.

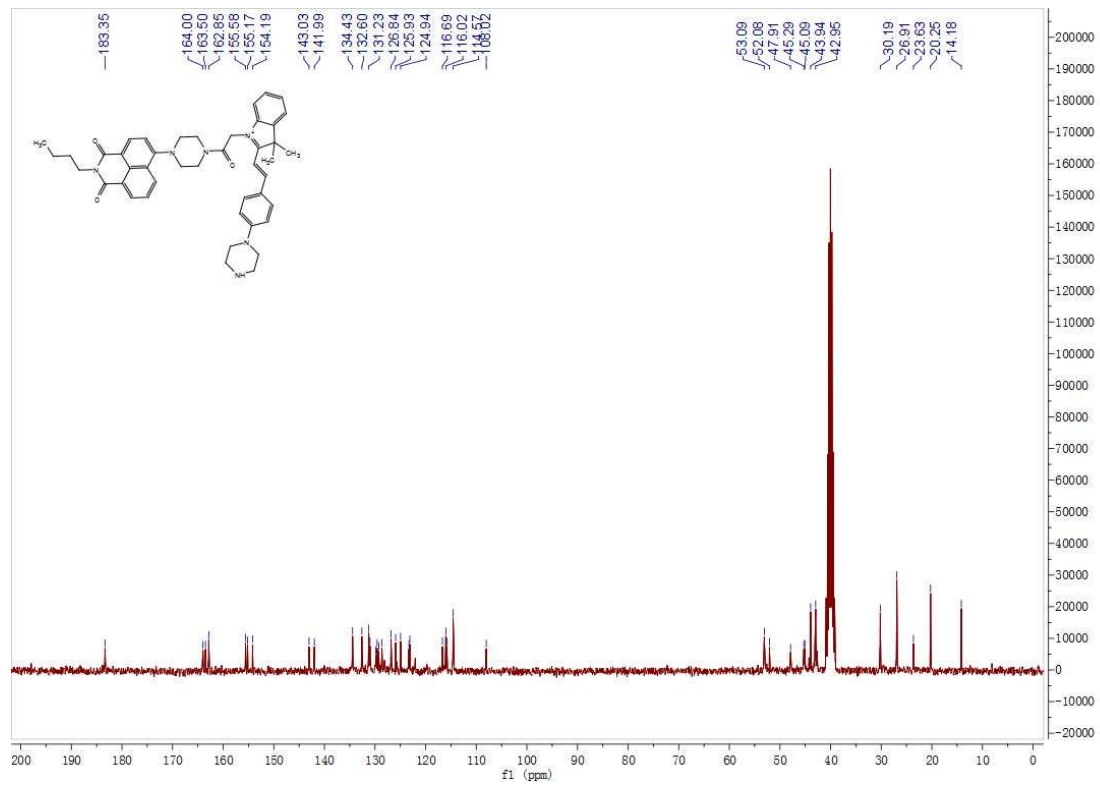

**Fig S5. MS spectrum of Np-Cy.**

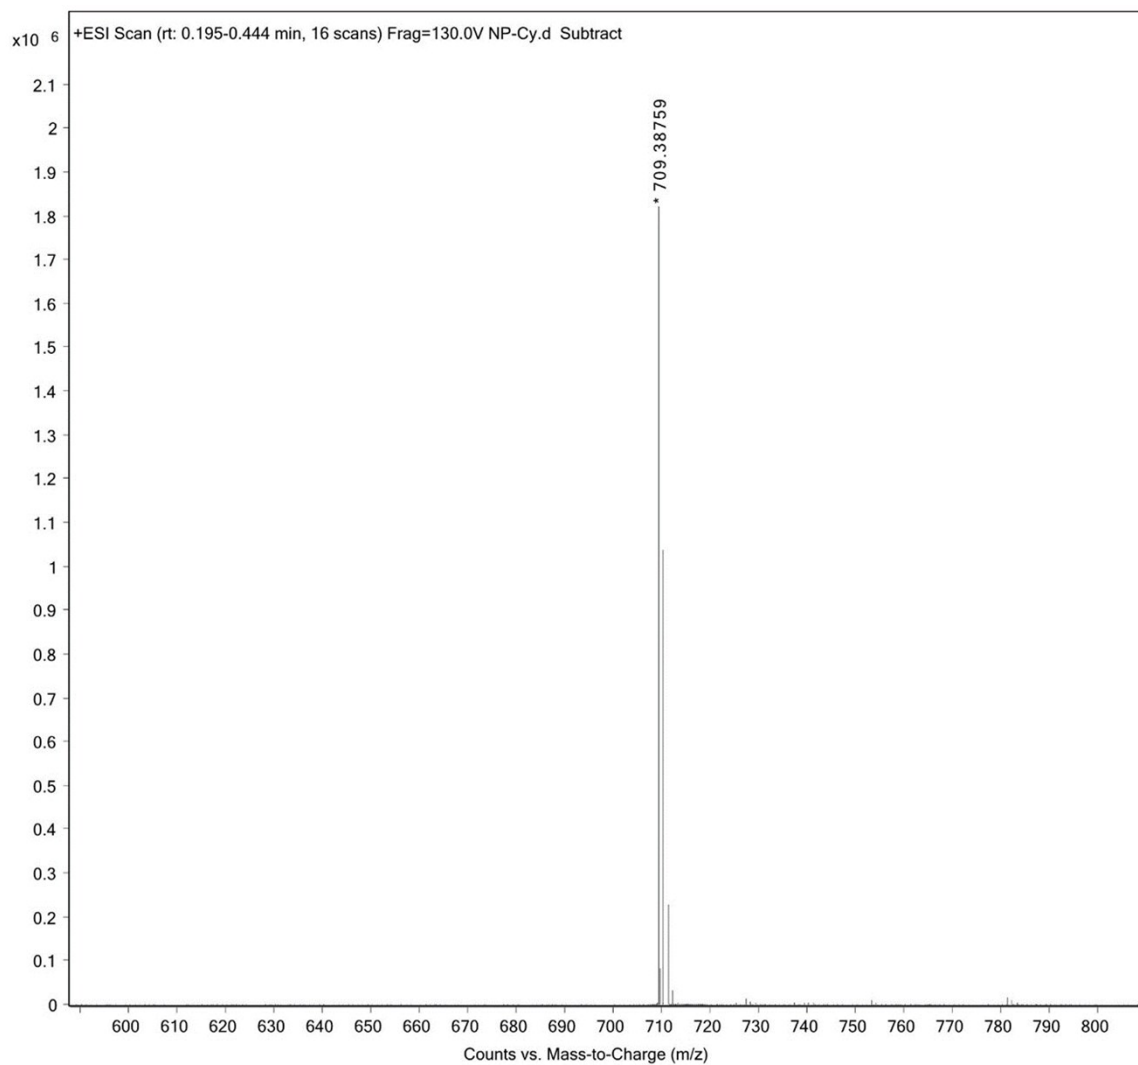

Supplement: c9nj01467e1.pdf [file c9nj01467e1.pdf]
